# Supplementary material for: Dual-color emitting Mn2+ ion doped (PEA)2PbBr4 perovskite towards white light-emitting diodes
Source: Royal Society of Chemistry journal article supplement (doi:10.1039/d0qm00478b), 2020-11-13
Supplement: d0qm00478b1.pdf [file d0qm00478b1.pdf]

## Dual-Color Emitting Mn<sup>2+</sup> ions Doped (PEA)<sub>2</sub>PbBr<sub>4</sub> Perovskite Towards White Light-Emitting Diodes

Xupeng Gao,<sup>a</sup> Xinyu Shen,<sup>a</sup> Dingke Xue,<sup>a</sup> Xin Li,<sup>a</sup> Po Lu,<sup>a</sup> Min Lu,<sup>a</sup> Chunyan Li,<sup>\*,b</sup> William W. Yu,<sup>\*,c</sup> and Xue Bai<sup>\*,a</sup>

<sup>a</sup> State Key Laboratory of Integrated Optoelectronics and College of Electronic Science and Engineering, Jilin University, Changchun 130012, China

<sup>b</sup> Department of Prothodontics, School and Hospital of Stomatology, Jilin University, Changchun, 130021, China

<sup>c</sup> Department of Chemistry and Physics, Louisiana State University, Shreveport, LA 71115, USA

\* Corresponding author E-mail: [cylu@jlu.edu.cn](mailto:cylu@jlu.edu.cn) (C. Y. Li),  
[wyu6000@gmail.com](mailto:wyu6000@gmail.com) (W. W. Yu),  
[baix@jlu.edu.cn](mailto:baix@jlu.edu.cn) (X. Bai)

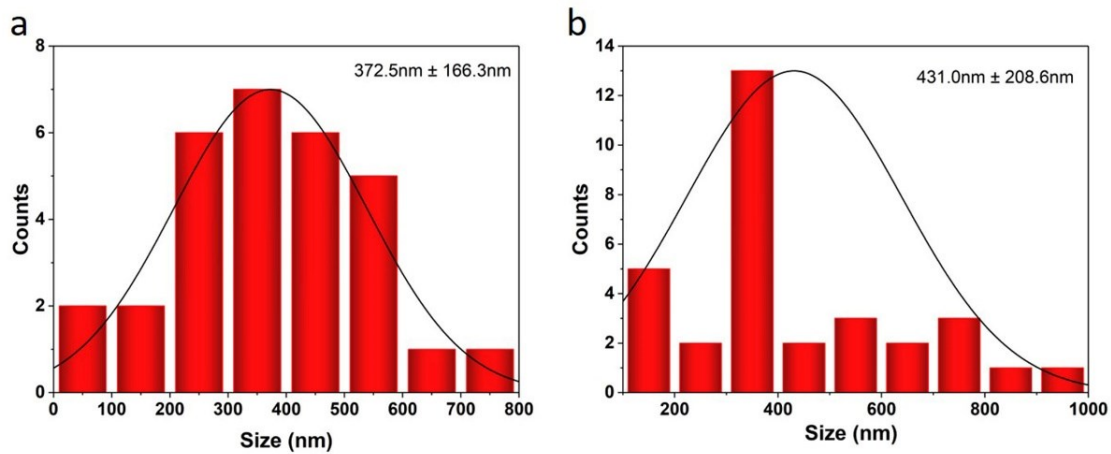

Fig. S1. Lateral (a) and vertical size (b) distributions of 2D (PEA)<sub>2</sub>PbBr<sub>4</sub> NCs.

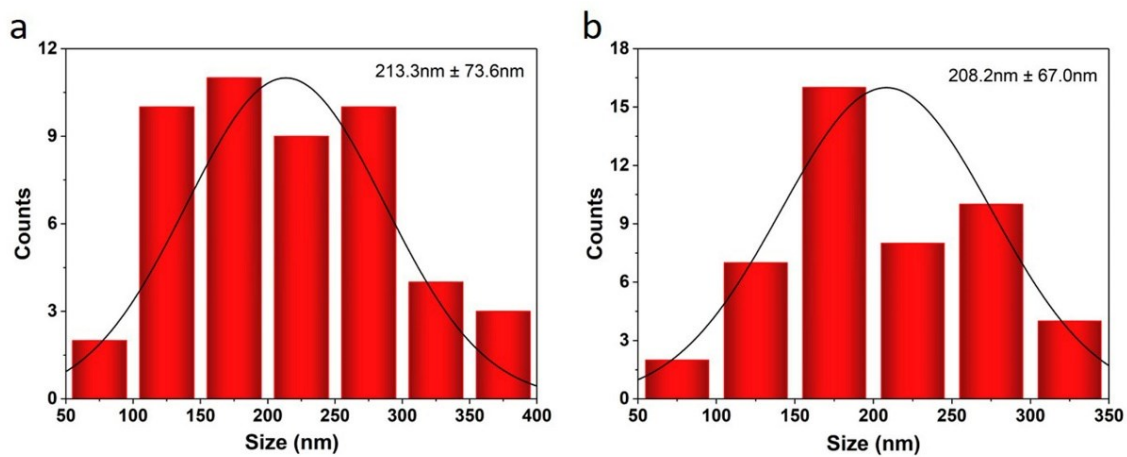

Fig. S2. Lateral (a) and vertical size (b) distribution of 60% Mn<sup>2+</sup> ions doped (PEA)<sub>2</sub>PbBr<sub>4</sub> NCs.

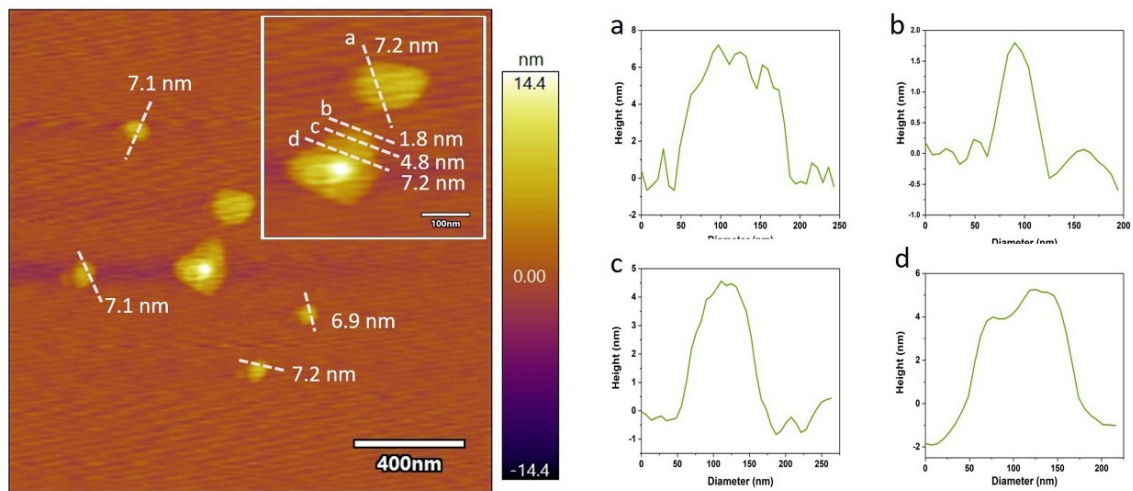

Fig. S3. AFM height image and height profile of 2D (PEA)<sub>2</sub>PbBr<sub>4</sub> NCs.

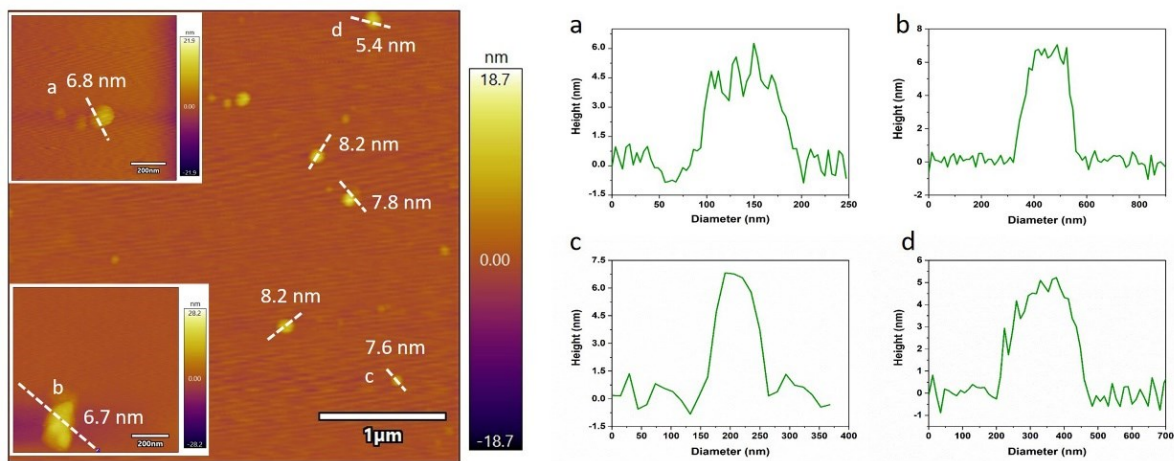

Fig. S4. AFM height image and height profile of 60% Mn<sup>2+</sup> ions doped (PEA)<sub>2</sub>PbBr<sub>4</sub> NCs.
